# Supplementary material
Source: publisher figshare collection journal article supplement (https://acs.figshare.com/ndownloader/files/7646062)
Supplement: Supplementary file 1 [file 7646062]

# Supporting Information

## Understanding the origins of higher capacities at faster rates in lithium-excess $\text{Li}_x\text{Ni}_{2-4x/3}\text{Sb}_{x/3}\text{O}_2$

Nancy Twu,<sup>†</sup> Michael Metzger,<sup>‡</sup> Mahalingam Balasubramanian,<sup>¶</sup> Cyril Marino,<sup>§</sup>  
Xin Li,<sup>||</sup> Hailong Chen,<sup>⊥</sup> Hubert Gasteiger,<sup>‡</sup> and Gerbrand Ceder<sup>\*,#</sup>

*Department of Materials Science and Engineering, Massachusetts Institute of Technology, Cambridge, MA 02139, USA, Chair of Technical Electrochemistry, Technische Universität München, Garching, Germany, X-ray Science Division, Advanced Photon Source, Argonne National Laboratory, Argonne, Illinois 60439, USA, Paul Scherrer Institut, 5232 Villigen PSI, Switzerland, School of Engineering and Applied Sciences, Harvard University, Cambridge, MA 02138, USA, The Woodruff School of Mechanical Engineering, Georgia Institute of Technology, Atlanta, GA 30332, USA, and Department of Materials Science and Engineering, University of California, Berkeley, CA 94720, USA*

E-mail: gceder@berkeley.edu

---

\*To whom correspondence should be addressed

<sup>†</sup>Massachusetts Institute of Technology

<sup>‡</sup>Technische Universität München

<sup>¶</sup>Argonne National Laboratory

<sup>§</sup>Paul Scherrer Institut

<sup>||</sup>Harvard University

<sup>⊥</sup>Georgia Institute of Technology

<sup>#</sup>University of California, Berkeley

Table 1: Elemental analysis of LNSO-5, LNSO-10, and LNSO-15 as determined by ICP-AES. Elemental analysis for LNSO-0 is not available.

| Sample  | Li (at%) | Ni (at%) | Sb (at%) |
|---------|----------|----------|----------|
| LNSO-5  | 0.86     | 0.55     | 0.32     |
| LNSO-10 | 0.93     | 0.49     | 0.34     |
| LNSO-15 | 1.15     | 0.43     | 0.35     |

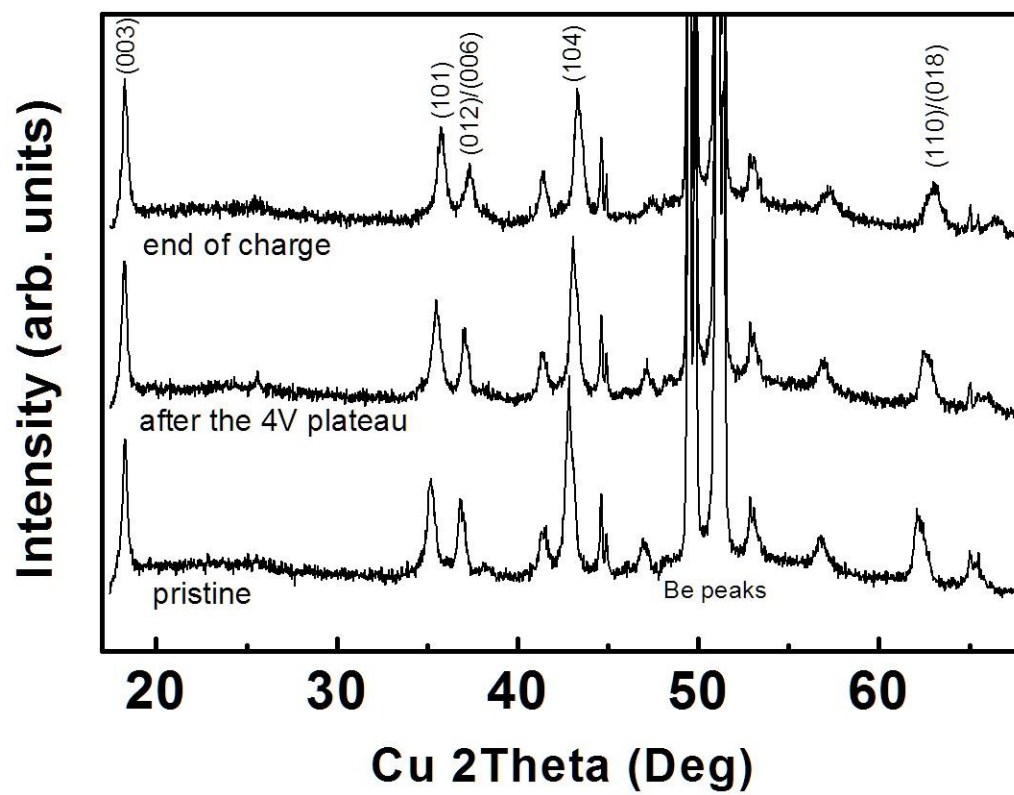

Figure S1: *In situ* XRD patterns of LNSO-15 at the start of charge (pristine), after the 4V plateau, and at the end of charge

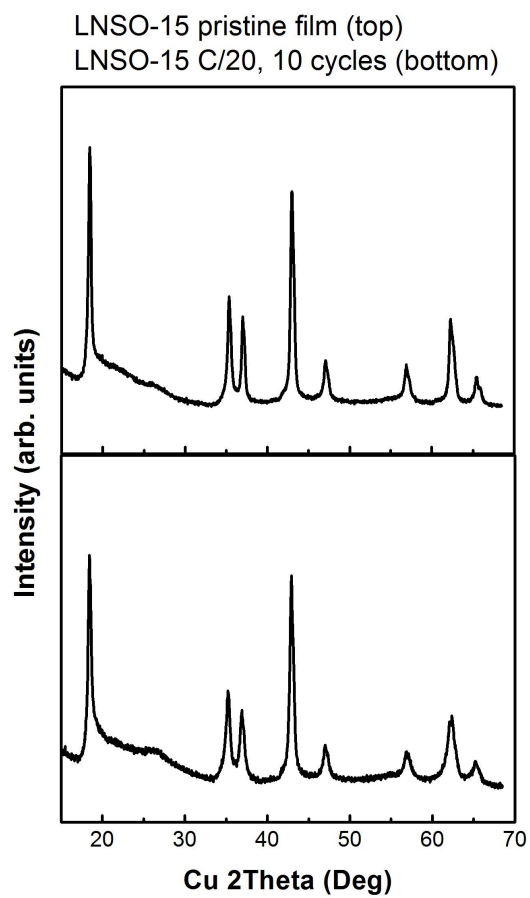

Figure S2: *Ex situ* XRD patterns of LNSO-15 pristine (top) versus after ten cycles at C/20 (bottom)
